# Supplementary material for: Quantified F-Actin Morphology Is Predictive of Phagocytic Capacity of Stem Cell-Derived Retinal Pigment Epithelium
Source: PubMed Central journal article supplement — Stem Cell Reports. 2018 Feb 15;10(3):1075–87. doi: 10.1016/j.stemcr.2018.01.017 (PMC5918243; doi:10.1016/j.stemcr.2018.01.017), 2018-02-15
Supplement: mmc1.pdf [file mmc1.pdf]

**Stem Cell Reports, Volume 10**

**Supplemental Information**

**Quantified F-Actin Morphology Is Predictive of Phagocytic Capacity of  
Stem Cell-Derived Retinal Pigment Epithelium**

**Claudia Müller, Carol Charniga, Sally Temple, and Silvia C. Finnemann**

Supplementary Table 1. Information on tissue donors, tissue procurement, and RPE cell yield.

| <b>RPE line</b> | <b>Age</b> | <b>Cause of death</b>  | <b>Time death to enucleation (h)</b> | <b>Time death to isolation of cells (h)</b> | <b>RPE cell yield (million)</b> |
|-----------------|------------|------------------------|--------------------------------------|---------------------------------------------|---------------------------------|
| 1               | 78         | Lung CA + metastasis   | 6.7                                  | 30.5                                        | 1.07                            |
| 2               | 53         | Breast CA + metastasis | 7.1                                  | 23.0                                        | 2.03                            |
| 3               | 76         | Respiratory failure    | 4.8                                  | 34.0                                        | 1.25                            |
| 4               | 74         | Arteriosclerotic CVD   | 16.0                                 | 38.8                                        | 1 globe only:<br>1.02           |
| 5               | 67         | Cardiac arrest         | 6.4                                  | 24.5                                        | 2.7                             |
| 6               | 67         | Cardiac arrest         | 5.4                                  | 39.0                                        | 3.4                             |
| 7               | 73         | Myocardial infarct     | 7.0                                  | 29.8                                        | 1 globe only:<br>1.34           |
| 8               | 70         | Cardiopulmonary arrest | 6.0                                  | 22.0                                        | 3.18                            |
